# Supplementary material for: Genome-Wide Chromatin Landscape Transitions Identify Novel Pathways in Early Commitment to Osteoblast Differentiation
Source: PubMed Central journal article supplement (PMC4759368; doi:10.1371/journal.pone.0148619), 2016-02-18
Supplement: pone.0148619.s012.pdf [file pone.0148619.s012.pdf]

## Supplemental Table 1

| <u>Gene transcript</u>       | <u>Forward 5'→3'</u>  | <u>Reverse 5'→3'</u> |
|------------------------------|-----------------------|----------------------|
| <i>Reference Gene</i>        |                       |                      |
| β Actin                      | ACAGAGCCTCGCCTTTGCCG  | TGGGCCTCGTCGCCACATA  |
| <i>Differentiation genes</i> |                       |                      |
| ALPL (ALP)                   | GAACCCCAAAGGCTTCTTCT  | GGGGTGTATCCACCAAATGT |
| ALPP                         | GGTGAACCGCAACTGGTACT  | CCCACCTTGGCTGTAGTCAT |
| ALPPL2                       | ACAGCTGCCAGGATCCTAAA  | CAAGCCAATGGTCTGGAAGT |
| COL 1A1                      | GAAAATGGAGCTCCTGGTCA  | TAGCACCATCATTTCACGA  |
| DLL1                         | TGTGCCTCAAGCACTACCAG  | GCGAGGTCATCAGGAGAATC |
| DLL3                         | TGAGCATGGCTTCTGTGAAC  | CATTCAAAGGACCTGGGTGT |
| NOTCH1                       | ACTGTGGAGGACCTGGTGGAC | TTGTAGGTGTTGGGGAGGTC |
| RUNX2                        | CGGAATGCCTCTGCTGTTAT  | TGGGGAGGATTTGTGAAGAC |
| PPAR <sub>γ</sub>            | TTCAGAAATGCCTTGCAGTG  | CCAACAGCTTCTCCTTCTCG |
