# Supplementary material for: Genome-Wide Chromatin Landscape Transitions Identify Novel Pathways in Early Commitment to Osteoblast Differentiation
Source: PubMed Central journal article supplement (PMC4759368; doi:10.1371/journal.pone.0148619), 2016-02-18
Supplement: pone.0148619.s013.pdf [file pone.0148619.s013.pdf]

## Supplemental Table 2

| <u>Primer Name</u> | <u>Primer Sequence</u>       | <u>Genomic Coordinates</u> |
|--------------------|------------------------------|----------------------------|
| EEF1A1_F           | 5'- TCTCTAGGCACCGGTTCAAT -3' | chr6:74287402-74287887     |
| EEF1A1_R           | 5'- TCGTCATCACTGAGGTGGAG -3' |                            |
| DCTN4_F            | 5'- ATAGAGAACCCGGTCCGACT- 3' | chr5:150118621-150119016   |
| DCTN4_R            | 5'- GGTGGGAAACCTAACGTCAA -3' |                            |
| USP5_F             | 5'- CGTTGCCGTTCTAAGCTAGG -3' | chr12:6831774-6832079      |
| USP5_R             | 5'- CAGGTTTTCTCAAGGGTCCA -3' |                            |
| Neg1_F             | 5'- AGCCCTACTTTGGAAGCTGA -3' | chr12:36174942 -36174961   |
| Neg1_R             | 5'- GGCATGAGGATTTCACTGGT -3' |                            |
| Neg2_F             | 5'- CAACAGTCCCCTGAGTGTGA -3' | chr2:35052543-35052793     |
| Neg2_R             | 5'- AAATGTTGGGGATTTCTTGG -3' |                            |
| MYO1B_F            | 5'- GCCAGTTTCAGCTCACTTCC -3' | chr22:24468283-24468566    |
| MYO1B_R            | 5'- CATGGAGGAGGAGCATTGT -3'  |                            |
