# Supplementary material for: Genome-Wide Chromatin Landscape Transitions Identify Novel Pathways in Early Commitment to Osteoblast Differentiation
Source: PubMed Central journal article supplement (PMC4759368; doi:10.1371/journal.pone.0148619), 2016-02-18
Supplement: pone.0148619.s014.pdf [file pone.0148619.s014.pdf]

Supplemental Table 3A

| OIM_d1 No Overlap B39_d1 |          |            |          |       |
|--------------------------|----------|------------|----------|-------|
| Motifs                   | P-value  | Best Match | Overlaps |       |
|                          | 1.00E-14 | SP1        | KLF4     |       |
|                          | 1.00E-14 | RUNX       | RUNX1    | RUNX2 |
|                          | 1.00E-11 | SMAD3      | E2F1     | E2A   |
|                          | 1.00E-11 | MAZ        | SP1      | SP4   |
|                          | 1.00E-10 | EGR        | SP1      | BCL6  |
|                          | 1.00E-10 | NKX2       | STAT3    |       |
|                          | 1.00E-07 | STAT3      | SPI1     | STAT6 |
|                          | 1.00E-06 | NKX2       | SP4      | ETS   |
| OIM_d2 No Overlap B39_d2 |          |            |          |       |
|                          | 1.00E-12 | MAZ        | RUNX     | EGR   |
|                          | 1.00E-12 | NR2F2      | E2F      | RARA  |
|                          | 1.00E-12 | NKX3       | STAT3    |       |
|                          | 1.00E-11 | PRDM1      | SMAD2    | SMAD3 |
|                          | 1.00E-10 | NHLH1      | SP1      | E2A   |
|                          | 1.00E-08 | EGR2       | EGR1     | SMAD3 |
|                          | 1.00E-08 | E2F1       | E2F4     | E2F6  |
|                          | 1.00E-08 | RFX1       | E2F      | YY1   |
|                          | 1.00E-08 | SPI1       | RFX4     | ETS1  |
|                          | 1.00E-08 | CEBPb      | CRX      | CEBPa |
|                          | 1.00E-07 | RXR        | PPARg    | TR4   |
|                          | 1.00E-07 | KLF4       | RUNX1    | RUNX2 |

### Supplemental Table 3B

| B39_d1 No Overlap OIM_d1                                  |          | P-value | Best Match | Overlaps |  |
|-----------------------------------------------------------|----------|---------|------------|----------|--|
| Motif                                                     |          |         |            |          |  |
| GGG <u>T</u> GGAG <u>ϕ</u> T <u>ϕ</u> TGG                 | 1.00E-14 | GC      | KLF4       | BCL6     |  |
| <u>T</u> TCCGGGTC <u>A</u> G                              | 1.00E-11 | ELK4    | ETS        |          |  |
| <u>A</u> G <u>ϕ</u> A <u>G</u> TAA <u>c</u> AA <u>A</u> T | 1.00E-10 | FOXA2   | SOX1       | SOX4,5,6 |  |
| <u>A</u> T <u>ϕ</u> GCTCT <u>A</u> TAG <u>A</u> G         | 1.00E-08 | TBP     | DCE        | E2F2     |  |
| CT <u>T</u> CCTCC <u>G</u> GC <u>ϕ</u> ACT                | 1.00E-08 | SPI1    | ETS        |          |  |
| A <u>G</u> GGGC <u>G</u> GG <u>G</u> GCAAGT               | 1.00E-06 | E2F2    | E2F3       |          |  |
| ACA <u>ϕ</u> A <u>G</u> <u>ϕ</u> GCGCA                    | 1.00E-06 | KLF7    | BCL6       | SP1      |  |
| B39_d2 No Overlap OIM_d2                                  |          |         |            |          |  |
| GGG <u>A</u> CGCC <u>A</u> AAA                            | 1.00E-14 | E2F     | E2F2       | E2F3     |  |
| TGGAGGGGG <u>G</u> CC <u>T</u>                            | 1.00E-12 | MAZ     | SP4        | EGR      |  |
| ATT <u>A</u> TA <u>C</u> T <u>C</u> ACA                   | 1.00E-12 | SOX30   | SRY        | NKX3     |  |
| AGG <u>ϕ</u> GG <u>A</u> STA                              | 1.00E-11 | ZEB1    | E2F        | EGR      |  |
| G <u>C</u> AA <u>T</u> CCAA <u>C</u> T <u>ϕ</u>           | 1.00E-11 | EGR1    | BRCA1      | NFIC     |  |
| G <u>T</u> AGGAAGGT <u>A</u> T                            | 1.00E-11 | SPI1    | ETC        |          |  |
| CTGGGGGCGG <u>C</u> CA                                    | 1.00E-11 | BCL6    | EGR        | SP4      |  |
| CCCACACGG <u>C</u> CCC                                    | 1.00E-10 | PLAG1   | SP1        | EGR      |  |
| C <u>G</u> CACG <u>C</u> CCAG <u>C</u> CC                 | 1.00E-09 | ARNT    | SMAD3      | EGR      |  |
