# Supplementary material for: Genome-Wide Chromatin Landscape Transitions Identify Novel Pathways in Early Commitment to Osteoblast Differentiation
Source: PubMed Central journal article supplement (PMC4759368; doi:10.1371/journal.pone.0148619), 2016-02-18
Supplement: pone.0148619.s015.pdf [file pone.0148619.s015.pdf]

|       |           |             |           |           |           |           |           |           |           |              |              |              |              |              |              |   |
|-------|-----------|-------------|-----------|-----------|-----------|-----------|-----------|-----------|-----------|--------------|--------------|--------------|--------------|--------------|--------------|---|
| 40438 | JAG1      | Jagged 1 (A | 5.1161433 | 6.3373200 | 7.1620533 | 6.9195466 | 6.2784300 | 7.8209766 | 8.9387133 | 1.221176667  | 2.04591      | 1.803403333  | 1.162286667  | 2.704833333  | 3.82257      | 5 |
| 40733 | PDE4C     | phosphodi   | 3.4612066 | 3.6545433 | 6.6613766 | 6.3987900 | 4.0166233 | 7.6904233 | 8.3638566 | 0.193336667  | 3.20017      | 2.937583333  | 0.555416667  | 4.229216667  | 4.90265      | 5 |
| 41030 | TNFRSF10A | tumor necr  | 5.7961533 | 5.9824966 | 7.5826933 | 7.2681766 | 6.3247066 | 8.1531633 | 8.5720900 | 0.186343333  | 1.78654      | 1.472023333  | 0.528553333  | 2.35701      | 2.775936667  | 5 |
| 42002 | PAPPA     | pregnancy-  | 3.9167533 | 4.0827566 | 5.8685566 | 5.2428300 | 4.4617700 | 6.4094833 | 7.4087733 | 0.166003333  | 1.951803333  | 1.326076667  | 0.545016667  | 2.49273      | 3.49202      | 5 |
| 42807 | SULF2     | sulfatase 2 | 4.8764066 | 4.7336133 | 7.4975533 | 7.2630333 | 5.0014666 | 7.6628266 | 7.7644566 | -0.142793333 | 2.621146667  | 2.386626667  | 0.12506      | 2.78642      | 2.88805      | 5 |
| 44911 | ---       | ---         | 5.7006700 | 5.7331933 | 8.2282666 | 7.5756233 | 5.1648966 | 7.0455233 | 8.0620166 | 0.032523333  | 2.527596667  | 1.874953333  | -0.535773333 | 1.344853333  | 2.361346667  | 5 |
| 46456 | MYOCD     | myocardin   | 4.5239166 | 6.6812700 | 7.8670900 | 7.2650633 | 5.7769066 | 6.8730000 | 7.0027366 | 2.157353333  | 3.343173333  | 2.741146667  | 1.25299      | 2.349083333  | 2.47882      | 5 |
| 49478 | CSMD3     | CUB and St  | 4.6779100 | 4.7342200 | 7.6142433 | 6.7947500 | 4.5790500 | 6.3417900 | 7.5956166 | 0.05631      | 2.936333333  | 2.11684      | -0.09886     | 1.66388      | 2.917706667  | 5 |
| 49494 | ---       | ---         | 7.3703866 | 4.5953399 | 7.0192666 | 7.2661933 | 5.0178000 | 6.8773599 | 6.8596266 | -2.775046667 | -0.35112     | -0.104193333 | -2.352586667 | -0.493026667 | -0.51076     | 5 |
| 49700 | ---       | ---         | 4.0478066 | 4.9569166 | 7.4660100 | 6.8751133 | 5.3384433 | 8.3604299 | 8.8506966 | 0.90911      | 3.418203333  | 2.827306667  | 1.290636667  | 4.312623333  | 4.80289      | 5 |
| 52337 | WDR63     | WD repeat   | 4.0056633 | 4.3365866 | 6.6398100 | 6.6774133 | 4.3529400 | 6.8626366 | 6.8874266 | 0.330923333  | 2.634146667  | 2.67175      | 0.347276667  | 2.856973333  | 2.881763333  | 5 |
| 54181 | ISG20     | interferon  | 8.6837433 | 7.8296500 | 6.0065866 | 7.1865100 | 7.5012400 | 6.7145933 | 5.6445266 | -0.854093333 | -2.677156667 | -1.497233333 | -1.182503333 | -1.96915     | -3.039216667 | 5 |
| 54295 | COL11A1   | collagen, t | 4.4607766 | 4.3241166 | 7.0951633 | 5.9864900 | 4.2567333 | 7.6612566 | 8.4583600 | -0.13666     | 2.634386667  | 1.525713333  | -0.204043333 | 3.20048      | 3.997583333  | 5 |
| 1902  | ABCD3     | ATP-bindin  | 6.9419200 | 7.0768933 | 4.2969500 | 4.6005433 | 6.0186566 | 4.7257600 | 4.3012433 | 0.134973333  | -2.64497     | -2.341376667 | -0.923263333 | -2.21616     | -2.640676667 | 6 |
| 4493  | LOC100128 | hypothetic  | 3.3737900 | 3.3241866 | 5.7093900 | 4.2517333 | 3.1773800 | 4.2580400 | 5.8535333 | -0.049603333 | 2.3356       | 0.877943333  | -0.19641     | 0.88425      | 2.479743333  | 6 |
| 10401 | CCND2     | cyclin D2   | 4.2809533 | 3.8603433 | 6.6247866 | 6.7490433 | 4.4266700 | 5.5246966 | 5.8863433 | -0.42061     | 2.343833333  | 2.46809      | 0.145716667  | 1.243743333  | 1.60539      | 6 |
| 11825 | SERPINA3  | serpin pep  | 4.6655433 | 4.3592200 | 4.6896433 | 4.6166433 | 4.9424066 | 7.3180200 | 7.0602033 | -0.306323333 | 0.0241       | -0.0489      | 0.276863333  | 2.652476667  | 2.39466      | 6 |
| 15459 | CASP1     | caspase 1,  | 3.6083266 | 3.4074000 | 5.8398466 | 5.1953933 | 3.4870400 | 6.1573733 | 6.5849033 | -0.200926667 | 2.23152      | 1.587066667  | -0.121286667 | 2.549046667  | 2.976576667  | 6 |
| 16034 | CCT6B     | chaperonir  | 5.8899366 | 4.4346233 | 3.6076866 | 3.5556766 | 4.5440733 | 3.6363200 | 3.5191966 | -1.455313333 | -2.28225     | -2.33426     | -1.345863333 | -2.253616667 | -2.37074     | 6 |
| 19975 | INHBE     | inhibin, be | 6.2179766 | 3.7641000 | 4.4657933 | 4.7804800 | 3.7040000 | 4.6776700 | 3.8657800 | -2.453876667 | -1.752183333 | -1.437496667 | -2.513976667 | -1.540306667 | -2.352196667 | 6 |
| 29074 | NPR3      | natriuretic | 4.5493333 | 5.3328866 | 4.6095266 | 5.0176600 | 5.5802233 | 7.4944766 | 6.9255600 | 0.783553333  | 0.060193333  | 0.468326667  | 1.03089      | 2.945143333  | 2.376226667  | 6 |
| 31589 | LOC100506 | hypothetic  | 6.6934133 | 5.5781200 | 4.2690600 | 4.3869300 | 5.4342766 | 4.7206700 | 4.0896000 | -1.115293333 | -2.424353333 | -2.306483333 | -1.259136667 | -1.972743333 | -2.603813333 | 6 |
| 32865 | THAP2     | THAP dom:   | 4.1674466 | 6.7447166 | 5.2230466 | 5.7121966 | 6.6898366 | 5.6075300 | 5.3798100 | 2.57727      | 1.0556       | 1.54475      | 2.52239      | 1.440083333  | 1.212363333  | 6 |
| 38109 | ---       | ---         | 2.9304466 | 2.9834033 | 2.8966000 | 2.9687066 | 3.0027033 | 6.2794466 | 7.4788499 | 0.052956667  | -0.033846667 | 0.03826      | 0.072256667  | 3.349        | 4.548403333  | 6 |
| 40759 | CCDC148   | coiled-coil | 4.2844833 | 4.2678800 | 7.0957566 | 6.6606800 | 3.9093466 | 4.3906633 | 4.5826033 | -0.016603333 | 2.811273333  | 2.376196667  | -0.375136667 | 0.10618      | 0.29812      | 6 |
| 44294 | CYYR1     | cysteine/ty | 3.3003566 | 3.5154633 | 5.3824900 | 5.5296566 | 3.6530033 | 5.8286100 | 5.7180100 | 0.215106667  | 2.082133333  | 2.2293       | 0.352646667  | 2.528253333  | 2.417653333  | 6 |
| 48169 | ---       | ---         | 3.5336566 | 4.1228100 | 4.0135266 | 4.2537166 | 5.2423533 | 6.1152500 | 6.6553066 | 0.589153333  | 0.47987      | 0.72006      | 1.708696667  | 2.581593333  | 3.12165      | 6 |
| 48900 | NCKAP5    | NCK-associ  | 3.1536766 | 3.3425566 | 5.7638466 | 5.5528100 | 2.9320000 | 5.4073299 | 6.7246633 | 0.18888      | 2.61017      | 2.399133333  | -0.221676667 | 2.253653333  | 3.570986667  | 6 |
