# Supplementary material for: Genome-Wide Chromatin Landscape Transitions Identify Novel Pathways in Early Commitment to Osteoblast Differentiation
Source: PubMed Central journal article supplement (PMC4759368; doi:10.1371/journal.pone.0148619), 2016-02-18
Supplement: pone.0148619.s016.pdf [file pone.0148619.s016.pdf]

| Symbol         | Synonym                                                      | Entrez Gene | Entrez Gene | Intensity | Delta_Log | Location   | Family function                            |
|----------------|--------------------------------------------------------------|-------------|-------------|-----------|-----------|------------|--------------------------------------------|
| <b>ADAMTS2</b> | a disintegrin-like and                                       | ADAM        | me          | NM_02159  | 15.0      | 1.1254766  | Extracellular peptidase                    |
| <b>ALKBH1</b>  | 2700073G alkB, alkylation repair homolog 1                   |             |             |           |           | 0.5684066  | Cytoplasm enzyme                           |
| <b>ALPL</b>    | AKP2, ALP alkaline phosphatase                               |             |             | NM_00112  | 19.7      | 0.8530433  | Plasma Membrane phosphatase                |
| <b>ALX4</b>    | ALX homeobox 4                                               |             |             | NM_02192  | 16.3      | -0.0880561 | Nucleus transcription regulator            |
| <b>AMER1</b>   | 2810002O APC membrane protein 1                              |             |             | NM_15242  | 11.9      | -0.0724131 | Plasma Membrane other                      |
| <b>APOE</b>    | AD2, AI25 apolipoprotein                                     |             |             | NM_00004  | 16.6      | 0.5746566  | Extracellular transporter                  |
| <b>BMP4</b>    | BMP2B, Bone morphogenetic protein 4                          |             |             | NM_13088  | 16.3      | 0.1652333  | Extracellular growth factor                |
| <b>BMP7</b>    | bone morphogenetic protein 7                                 |             |             | NM_00171  | 11.3      | -0.0865061 | Extracellular growth factor                |
| <b>CCND1</b>   | AI327039, cyclin D1                                          |             |             | NM_05308  | 26.3      | 0.0574033  | Nucleus transcription regulator            |
| <b>CDKN1A</b>  | CAP20, Cyclin-dependent kinase 1                             |             |             | NM_00038  | 14.4      | 1.7663000  | Nucleus kinase                             |
| <b>CHSY1</b>   | CHONDRIN, chondroitinase                                     |             |             | NM_01491  | 27.9      | -0.0677661 | Cytoplasm enzyme                           |
| <b>COL11A2</b> | collagen, type XI, alpha 2                                   |             |             |           |           | -0.1826931 | Extracellular other                        |
| <b>COL12A1</b> | AW74388, collagen, type XII, alpha 1                         |             |             | NM_00437  | 5.3       | 0.8381266  | Extracellular other                        |
| <b>COL18A1</b> | COLLAGE, collagen, type XVIII, alpha 1                       |             |             | NM_13044  | 50.4      | -0.1182361 | Extracellular other                        |
| <b>COL2A1</b>  | ANFH, Collagen, type II, alpha 1                             |             |             | NM_00184  | 1.3       | 0.2310433  | Extracellular other                        |
| <b>CREBBP</b>  | AW55829, CREB-binding protein                                |             |             | NM_00438  | 21.6      | -0.3455261 | Nucleus transcription regulator            |
| <b>CYP27B1</b> | 1-Hydroxyl cytochrome P450, family 27, subfamily B, member 1 |             |             |           |           | -0.1387491 | Cytoplasm enzyme                           |
| <b>DLL3</b>    | delta-like 3 (Drosophila)                                    |             |             |           |           | -0.4834291 | Extracellular other                        |
| <b>DLX1</b>    | distal-less 1, homeobox protein                              |             |             |           |           | -0.2467261 | Nucleus transcription regulator            |
| <b>DMRT2</b>   | doublesex 2, homeobox protein                                |             |             | NM_00658  | 15.0      | -0.1355491 | Nucleus other                              |
| <b>DVL1</b>    | DISHEVELLED, segment polarity protein 1                      |             |             |           |           | -0.0260801 | Cytoplasm other                            |
| <b>DVL3</b>    | dishevelled 3, segment polarity protein                      |             |             |           |           | 0.2992433  | Cytoplasm other                            |
| <b>E2F3</b>    | E2F transcription factor 3                                   |             |             | NM_00194  | 12.5      | 0.0192633  | Nucleus transcription regulator            |
| <b>EFNB1</b>   | Cek5-L, Ephrin-B1                                            |             |             | NM_00442  | 13.8      | -0.0248631 | Plasma Membrane other                      |
| <b>EGLN2</b>   | 0610011A egl-9 family hypoxia-inducible factor 2             |             |             |           |           | -0.1571961 | Cytoplasm enzyme                           |
| <b>ELN</b>     | AI385707, elastin                                            |             |             | NM_00108  | 7.8       | -0.0716631 | Extracellular other                        |
| <b>EMX2</b>    | empty spiracle 2, homeobox protein                           |             |             | NM_00118  | 13.5      | 0.0385899  | Nucleus transcription regulator            |
| <b>EN1</b>     | engrailed 1, homeobox protein                                |             |             | NM_00142  | 16.9      | 0.0662233  | Nucleus transcription regulator            |
| <b>EPHB3</b>   | AW45689, Eph receptor B3                                     |             |             | NM_00444  | 16.9      | -0.35534   | Plasma Membrane kinase                     |
| <b>EYA1</b>    | BOP, BOF EYA transcription factor 1                          |             |             | NM_00050  | 18.8      | 0.6492266  | Nucleus phosphatase                        |
| <b>FAM20C</b>  | BC004044 family with                                         |             |             | NM_02022  | 11.3      | -0.64276   | Extracellular enzyme                       |
| <b>FBN1</b>    | ACMICD, fibrillin 1                                          |             |             | NM_00018  | 14.1      | 2.3645200  | Extracellular other                        |
| <b>FGF3</b>    | fibroblast growth factor 3                                   |             |             | NM_00524  | 12.8      | -0.0561631 | Extracellular growth factor                |
| <b>FGFR3</b>   | ACH, CD3 fibroblast growth factor receptor 3                 |             |             | NM_00118  | 32.6      | -0.75474   | Plasma Membrane kinase                     |
| <b>FGFRL1</b>  | FGFR5, Fibroblast growth factor receptor-like 1              |             |             | NM_02192  | 21.6      | -0.2736461 | Plasma Membrane transmembrane receptor     |
| <b>FKBP8</b>   | FK506 binding protein 8, 38kDa                               |             |             |           |           | -0.2621491 | Cytoplasm other                            |
| <b>FOSL2</b>   | FLJ23306, FOS-like protein 2                                 |             |             | NM_00528  | 13.8      | 1.2218366  | Nucleus transcription regulator            |
| <b>FOXF2</b>   | Fkh20, Forkhead box protein F2                               |             |             | NM_00148  | 14.7      | -0.0533701 | Nucleus transcription regulator            |
| <b>FOXI3</b>   | forkhead box protein I3                                      |             |             | NM_00118  | 3.4       |            | Nucleus transcription regulator            |
| <b>FST</b>     | AL033346 follistatin                                         |             |             | NM_01340  | 7.5       | 0.3158900  | Extracellular other                        |
| <b>FZD9</b>    | CD349, frizzled class 9                                      |             |             | NM_00350  | 23.8      | -0.3081931 | Plasma Membrane G-protein coupled receptor |
| <b>GAD1</b>    | CPSQ1, E glutamate decarboxylase 1                           |             |             | NM_01344  | 13.5      | -0.1617501 | Cytoplasm enzyme                           |
| <b>GBX2</b>    | D130058E gastrulation homeobox 2                             |             |             | NM_00148  | 26.0      | -0.1044731 | Nucleus transcription regulator            |
| <b>GDF6</b>    | BMP-13, Growth differentiation factor 6                      |             |             | NM_00100  | 18.5      |            | Extracellular growth factor                |
| <b>GLI2</b>    | AW54612, Gli family zinc finger 2                            |             |             | NM_00527  | 19.4      | -0.2030661 | Nucleus transcription regulator            |
| <b>GNA11</b>   | BOS 7750 guanine nucleotide binding protein 11               |             |             | NM_00200  | 19.7      | 0.1356299  | Plasma Membrane enzyme                     |
| <b>GNAI3</b>   | 87U6, AI1 guanine nucleotide binding protein 3               |             |             |           |           | -0.3315661 | Cytoplasm enzyme                           |
| <b>GPBR1</b>   | 6330420K G protein-coupled receptor 1                        |             |             | NM_00100  | 16.9      | -0.6100161 | Plasma Membrane G-protein coupled receptor |
| <b>GPR55</b>   | G protein-coupled receptor 55                                |             |             |           |           | -0.1208761 | Plasma Membrane G-protein coupled receptor |
| <b>H19</b>     | AI747191, H19, imprinting control region                     |             |             | NR_00219  | 15.4      | 1.2130100  | Cytoplasm other                            |
| <b>HIVP3</b>   | 2900056N human immunodeficiency virus protein 3              |             |             | NM_02450  | 17.9      | 1.9700033  | Nucleus transcription regulator            |
| <b>HMX3</b>    | H6 family homeobox 3                                         |             |             | NM_00110  | 7.5       |            | Nucleus transcription regulator            |
| <b>HOXA1</b>   | BSAS, ER homeobox A1                                         |             |             |           |           | 0.0735833  | Nucleus transcription regulator            |

|               |                                               |      |           |             |                            |
|---------------|-----------------------------------------------|------|-----------|-------------|----------------------------|
| <b>HOXA2</b>  | AI324701, homeobox NM_00673                   | 19.7 | -0.131299 | Nucleus     | transcription regulator    |
| <b>HOXA5</b>  | homeo bo: homeobox NM_01910                   | 18.2 | -0.157173 | Nucleus     | transcription regulator    |
| <b>HOXA9</b>  | ABD-B, Df homeobox A9                         |      |           | Nucleus     | transcription regulator    |
| <b>HOXB2</b>  | AI894218, homeobox NM_00214                   | 31.6 | -0.194786 | Nucleus     | transcription regulator    |
| <b>HOXB3</b>  | homeo bo: homeobox NM_00214                   | 9.4  | -0.142913 | Nucleus     | transcription regulator    |
| <b>HOXB4</b>  | B4, homeo homeobox B4                         |      | 0.1056433 | Nucleus     | transcription regulator    |
| <b>HOXB9</b>  | homeo bo: homeobox NM_02401                   | 21.6 | -0.700233 | Nucleus     | transcription regulator    |
| <b>HOXC4</b>  | cp19, hom homeobox NM_15363                   | 19.4 | -0.038053 | Nucleus     | transcription regulator    |
| <b>HOXC6</b>  | CP25, HH homeobox C6                          |      | 0.1532266 | Nucleus     | transcription regulator    |
| <b>HOXD10</b> | AI385591, homeobox D10                        |      | -0.048183 | Nucleus     | transcription regulator    |
| <b>HOXD11</b> | E230017H homeobox D11                         |      | -0.242786 | Nucleus     | transcription regulator    |
| <b>HOXD12</b> | homeo bo: homeobox D12                        |      | -0.067069 | Nucleus     | transcription regulator    |
| <b>HOXD3</b>  | homeo bo: homeobox NM_00683                   | 32.9 | 0.0895633 | Nucleus     | transcription regulator    |
| <b>HOXD4</b>  | 6030436D homeobox D4                          |      | 0.1531766 | Nucleus     | transcription regulator    |
| <b>HS6ST1</b> | 6Ost1, hef heparan s1 NM_00480                | 17.5 | 0.506190  | Plasma M    | enzyme                     |
| <b>HSPG2</b>  | AI852380, heparan s1 NM_00552                 | 19.7 | 0.9481366 | Extracellul | enzyme                     |
| <b>IGFALS</b> | ACLSA, A insulin-like NM_00114                | 21.0 | -0.304610 | Extracellul | other                      |
| <b>INPP5E</b> | 1200002L: inositol pol NM_01983               | 16.3 | -0.080086 | Cytoplasm   | phosphatase                |
| <b>ITGA3</b>  | AA407068 integrin, al NM_00220                | 18.2 | 0.1801666 | Plasma M    | other                      |
| <b>ITGB2</b>  | 2E6, AI523 integrin, b1 NM_00112              | 18.8 | -0.268663 | Plasma M    | transmembrane receptor     |
| <b>JAG2</b>   | D12Ggc2e jagged 2 NM_14513                    | 17.9 | 0.2614733 | Extracellul | growth factor              |
| <b>KCNQ1</b>  | ATFB1, A1 potassium NM_18173                  | 17.5 | -0.146573 | Plasma M    | ion channel                |
| <b>KIF7</b>   | ACLS, HL kinesin far NM_19852                 | 12.2 | -0.163450 | Extracellul | other                      |
| <b>KLF10</b>  | AI115143, Kruppel-lik NM_00563                | 8.5  | -0.177640 | Nucleus     | transcription regulator    |
| <b>KLF2</b>   | Kruppel-lik Kruppel-lik NM_01627              | 21.0 | -1.2508   | Nucleus     | transcription regulator    |
| <b>LFNG</b>   | AW06116: LFNG O-f NM_00104                    | 23.5 | -0.183633 | Cytoplasm   | enzyme                     |
| <b>LIF</b>    | CDF, choli leukemia ii NM_00230               | 10.7 | 0.3438566 | Extracellul | cytokine                   |
| <b>LMX1B</b>  | LIM homer LIM homer NM_00117                  | 17.5 | -0.173016 | Nucleus     | transcription regulator    |
| <b>LRP5</b>   | BMND1, E low densit NM_00233                  | 62.3 | 0.3459566 | Plasma M    | transmembrane receptor     |
| <b>LRRK1</b>  | AW31959: leucine-ric NM_02463                 | 16.3 | 0.3609866 | Cytoplasm   | kinase                     |
| <b>LTPB3</b>  | Latent trar latent trans NM_00113             | 18.8 | 0.5269566 | Extracellul | other                      |
| <b>MATN1</b>  | CMP, CRT matrilin 1, cartilage matrix protein |      | -0.178276 | Extracellul | other                      |
| <b>MDFI</b>   | I-MF, I-mf MyoD fami NM_00553                 | 12.2 | -0.133676 | Cytoplasm   | other                      |
| <b>MEOX1</b>  | AI385561, mesenchy NM_00452                   | 27.3 | -0.310556 | Nucleus     | transcription regulator    |
| <b>MFAP2</b>  | AI893631, microfibrilli NM_00113              | 17.2 | 0.017060  | Extracellul | other                      |
| <b>MFNG</b>   | AL591946 MFNG O-f NM_00240                    | 14.4 | 0.1817366 | Cytoplasm   | enzyme                     |
| <b>MNT</b>    | bHLHd3, M MAX netw NM_02031                   | 17.5 | -0.238086 | Nucleus     | transcription regulator    |
| <b>MS1</b>    | m-Msi-1, M musashi R NM_00244                 | 56.1 | -0.204989 | Cytoplasm   | other                      |
| <b>MYF5</b>   | B130010J: myogenic factor 5                   |      | 2.3756099 | Nucleus     | transcription regulator    |
| <b>MYOG</b>   | bHLHc3, M myogenin (myogenic factor 4)        |      | 0.674790  | Nucleus     | transcription regulator    |
| <b>NAB2</b>   | AI451907, NGFI-A binding protein 2 (EGR1      |      | -0.220293 | Nucleus     | transcription regulator    |
| <b>NACC1</b>  | 2010001H nucleus accumbens associated         |      | -0.369146 | Nucleus     | transcription regulator    |
| <b>NAGLU</b>  | alpha-N-ac N-acetylglucosaminidase, alpha     |      | -0.258659 | Cytoplasm   | enzyme                     |
| <b>NFIC</b>   | 1110019L: nuclear fac NM_00553                | 17.9 | 0.1972633 | Nucleus     | transcription regulator    |
| <b>NFIX</b>   | CTF, MRS nuclear fac NM_00250                 | 26.0 | -0.629200 | Nucleus     | transcription regulator    |
| <b>NOS3</b>   | 2310065A: nitric oxide NM_00113               | 14.4 | -0.335076 | Cytoplasm   | enzyme                     |
| <b>NPR2</b>   | AMDM, Ar natriuretic peptide receptor 2       |      | 0.808210  | Plasma M    | G-protein coupled receptor |
| <b>OTX1</b>   | A730044F orthodenticle homeobox 1             |      | -0.098090 | Nucleus     | transcription regulator    |
| <b>PAX1</b>   | hbs, huncf paired box NM_00613                | 17.9 | 0.1059333 | Nucleus     | transcription regulator    |
| <b>PAX2</b>   | FSGS7, O paired box NM_00027                  | 21.0 | 0.0403599 | Nucleus     | transcription regulator    |
| <b>PAX7</b>   | HUP1, LO paired box NM_00113                  | 14.7 | 0.2874033 | Nucleus     | transcription regulator    |
| <b>PAX8</b>   | paired box paired box NM_01393                | 20.7 | -0.223699 | Nucleus     | transcription regulator    |
| <b>PITX1</b>  | BFT, CCF, paired-like NM_00263                | 13.5 | -0.174549 | Nucleus     | transcription regulator    |
| <b>PITX2</b>  | 9430085M paired-like NM_00032                 | 22.6 | 0.4241599 | Nucleus     | transcription regulator    |
| <b>PKD1</b>   | mFLJ0023 polycystic NM_00023                  | 43.9 | -0.238703 | Plasma M    | ion channel                |
| <b>PLXNA1</b> | 2600013D plexin A1 NM_03224                   | 13.8 | 0.472350  | Plasma M    | transmembrane receptor     |

|                 |                                                                                         |                                                     |
|-----------------|-----------------------------------------------------------------------------------------|-----------------------------------------------------|
| <b>PLXND1</b>   | 6230425C plexin D1 NM_01510 11.3                                                        | 0.5124633 Plasma M: transmembrane receptor          |
| <b>POU3F3</b>   | Brain1, BF POU class NM_00620 14.7                                                      | 0.0519533 Nucleus transcription regulator           |
| <b>PTCH1</b>    | A230106A patched 1 NM_00100 15.0                                                        | -0.494986 Plasma M: transmembrane receptor          |
| <b>PTHLH</b>    | BDE2, HH parathyroid NM_19890 8.5                                                       | -0.626643 Extracellular other                       |
| <b>PTPN2</b>    | A1325124, protein tyrosine kinase NM_00280 21.3                                         | -0.428996 Cytoplasm phosphatase                     |
| <b>RAI1</b>     | DOM3, Gt retinoic acid receptor NM_03060 13.5                                           | -0.384676 Cytoplasm other                           |
| <b>RFNG</b>     | RFNG O-fucose transferase 3-beta-1 NM_00000 18.2                                        | 0.4347433 Cytoplasm enzyme                          |
| <b>RGMA</b>     | BC059072 repulsive cell adhesion molecule 1 NM_02020 18.2                               | 0.1420733 Plasma M: other                           |
| <b>RING1</b>    | DADB-10C ring finger protein 1 NM_00290 25.7                                            | -0.135586 Nucleus transcription regulator           |
| <b>ROR2</b>     | BDB, BDB receptor tyrosine kinase NM_00450 16.9                                         | -0.220513 Plasma M: kinase                          |
| <b>SBNO2</b>    | BC019206 strawberry notch homolog 2 (Drosophila) NM_00000 18.2                          | -0.096030 Other transcription regulator             |
| <b>SHH</b>      | 95300360 sonic hedgehog NM_00010 13.2                                                   | -0.137416 Extracellular peptidase                   |
| <b>SIX1</b>     | BB138287 SIX homeobox 1 NM_00000 18.2                                                   | 0.130699 Nucleus transcription regulator            |
| <b>SKI</b>      | 231001210 SKI proto-oncogene NM_00300 31.6                                              | 0.449190 Nucleus transcription regulator            |
| <b>SLC39A14</b> | BC021530 solute carrier family 39 member 14 NM_00110 12.5                               | 0.14337 Plasma M: transporter                       |
| <b>SLC4A2</b>   | AE2, Aep2 solute carrier family 4 (anion exchanger) member 2 NM_00000 18.2              | -0.208226 Plasma M: transporter                     |
| <b>SMAD3</b>    | AU022421 SMAD family member 3 NM_00590 15.0                                             | 0.232219 Nucleus transcription regulator            |
| <b>SOX9</b>     | 2010306G SRY (sex determining region Y) box 9 NM_00030 8.1                              | -1.052923 Nucleus transcription regulator           |
| <b>SRC</b>      | ASV, AW2 SRC proto-oncogene NM_19820 13.5                                               | 0.194060 Cytoplasm kinase                           |
| <b>TBX1</b>     | CAFS, CA T-box 1 NM_00590 18.2                                                          | -0.330773 Nucleus transcription regulator           |
| <b>TBX5</b>     | HOS, T-box 5 NM_00010 16.6                                                              | -0.201773 Nucleus transcription regulator           |
| <b>TCF15</b>    | BHLH-EC transcription factor 15 (basic helix-loop-helix) NM_00000 18.2                  | -0.222209 Nucleus transcription regulator           |
| <b>TCIRG1</b>   | a3, ATP6a T-cell, immunoregulatory 1 NM_00600 15.4                                      | 1.007299 Plasma M: enzyme                           |
| <b>TFAP2A</b>   | activating transcription factor AP-2 alpha (epsilon) NM_00000 18.2                      | -0.126843 Nucleus transcription regulator           |
| <b>THRA</b>     | 6430529J thyroid hormone receptor, alpha NM_00000 18.2                                  | 0.4276233 Nucleus ligand-dependent nuclear receptor |
| <b>TMEM119</b>  | AW20894 transmembrane protein 119 NM_18170 12.5                                         | 0.914696 Cytoplasm other                            |
| <b>TP73</b>     | P73, p73 tumor protein 73 NM_00110 20.4                                                 | -0.082410 Nucleus transcription regulator           |
| <b>TSHZ1</b>    | 573040710 teashirt zinc finger protein 1 NM_00570 14.1                                  | -0.609563 Nucleus transcription regulator           |
| <b>UNCX</b>     | Chx4, LOC UNC homeobox 4 NM_00100 36.7                                                  | 0.1420733 Other transcription regulator             |
| <b>VDR</b>      | BOS 5154 vitamin D (1,25-dihydroxyvitamin D3) receptor NM_00000 18.2                    | 0.245266 Nucleus transcription regulator            |
| <b>VEGFA</b>    | BOS 2146 vascular endothelial growth factor A NM_00100 3.1                              | 0.3762433 Extracellular growth factor               |
| <b>WFIKKN1</b>  | C16orf12, WAP, follistatin/kazal, immunoglobulin-like domain containing 1 NM_00000 18.2 | -0.091139 Cytoplasm other                           |
| <b>WNT1</b>     | BMND16, wingless-type MMTV integration site 1 NM_00000 18.2                             | -0.113279 Extracellular cytokine                    |
| <b>WNT3A</b>    | RP23-378 wingless-type MMTV integration site 3A NM_03310 13.2                           | 0.14337 Extracellular cytokine                      |
| <b>WNT5A</b>    | 8030457G wingless-type MMTV integration site 5A NM_00330 16.6                           | 1.783319 Extracellular cytokine                     |
| <b>WNT9A</b>    | RP23-378 wingless-type MMTV integration site 9A NM_00330 15.7                           | -0.200350 Extracellular other                       |
| <b>ZBTB16</b>   | A1467657, zinc finger protein 16 NM_00100 12.2                                          | 1.542956 Nucleus transcription regulator            |
| <b>ZIC5</b>     | 1700049L Zic family zinc finger 5 NM_03310 12.5                                         | 0.0435033 Nucleus transcription regulator           |
| <b>ZNF521</b>   | B930086A zinc finger protein 521 NM_01540 6.9                                           | 0.1438333 Nucleus other                             |
