# Supplementary material for: Genome-Wide Chromatin Landscape Transitions Identify Novel Pathways in Early Commitment to Osteoblast Differentiation
Source: PubMed Central journal article supplement (PMC4759368; doi:10.1371/journal.pone.0148619), 2016-02-18
Supplement: pone.0148619.s017.pdf [file pone.0148619.s017.pdf]

## S6 Table

<http://www.ncbi.nlm.nih.gov/geo/query/acc.cgi?acc=GSE75232>.

| DHS        | Sample name            | characteristics: treatment    |
|------------|------------------------|-------------------------------|
| 1          | B34 rep#1 DNase-seq    | untreated, grow at 34oC in BM |
| 2          | B34 rep#2 DNase-seq    | untreated, grow at 34oC in BM |
| 3          | B39-d1 rep#1 DNase-seq | untreated, grow at 39oC in BM |
| 4          | B39-d1 rep#2 DNase-seq | untreated, grow at 39oC in BM |
| 5          | B39-d2 rep#1 DNase-seq | untreated, grow at 39oC in BM |
| 6          | B39-d2 rep#2 DNase-seq | untreated, grow at 39oC in BM |
| 7          | OIM-d1 rep#1 DNase-seq | untreated, 39oC in OIM        |
| 8          | OIM-d1 rep#2 DNase-seq | untreated, 39oC in OIM        |
| 9          | OIM-d2 rep#1 DNase-seq | untreated, 39oC in OIM        |
| 10         | Oim-d2 rep#2 DNase-seq | untreated, 39oC in OIM        |
|            |                        |                               |
| Micriarray | Sample name            | characteristics: treatment    |
| 1          | B34BM_1                | untreated, grow at 34oC in BM |
| 2          | B34BM_2                | untreated, grow at 34oC in BM |
| 3          | B34BM_3                | untreated, grow at 34oC in BM |
| 4          | B39_4hr_1              | untreated, grow at 34oC in BM |
| 5          | B39_4hr_2              | untreated, grow at 39oC in BM |
| 6          | B39_4hr_3              | untreated, grow at 39oC in BM |
| 7          | B39_24hr_1             | untreated, grow at 39oC in BM |
| 8          | B39_24hr_2             | untreated, grow at 39oC in BM |
| 9          | B39_24hr_3             | untreated, grow at 39oC in BM |
| 10         | B39_48hr_1             | untreated, grow at 39oC in BM |
| 11         | B39_48hr_2             | untreated, grow at 39oC in BM |
| 12         | B39_48hr_3             | untreated, grow at 39oC in BM |
| 13         | OIM_4hr_1              | OIM treated, grow at 39oC     |
| 14         | OIM_4hr_2              | OIM treated, grow at 39oC     |
| 15         | OIM_4hr_3              | OIM treated, grow at 39oC     |
| 16         | OIM_24hr_1             | OIM treated, grow at 39oC     |
| 17         | OIM_24hr_2             | OIM treated, grow at 39oC     |
| 18         | OIM_24hr_3             | OIM treated, grow at 39oC     |
| 19         | OIM_48hr_1             | OIM treated, grow at 39oC     |
| 20         | OIM_48hr_2             | OIM treated, grow at 39oC     |
| 21         | OIM_48hr_3             | OIM treated, grow at 39oC     |
